# Supplementary material for: Fabrication of cellulose paper-based counter electrodes for flexible dye-sensitized solar cells
Source: Royal Society of Chemistry journal article supplement (doi:10.1039/d2cp04358k), 2022-12-08

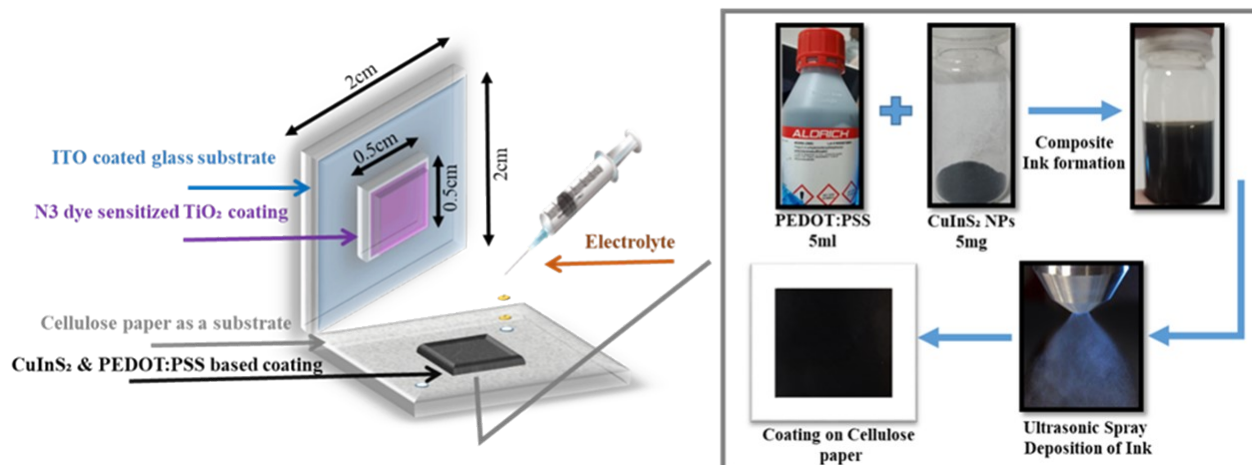

Fig. (S-1) Schematic of counter electrode fabrication and dye sensitized solar cell.

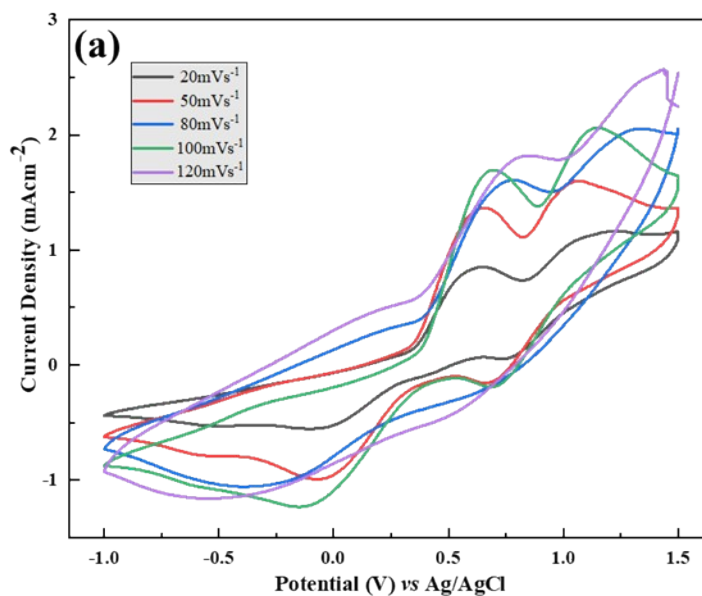

Fig. (S-2) Cyclic Voltammetry curves of the CuInS<sub>2</sub>/PEDOT:PSS counter electrode at 20-120 mVs<sup>-1</sup> scan rate from -1.0 to 1.5 V in electrolyte solution consists of 1mM I<sub>2</sub>, 10 mM LiI, and 100

mM LiClO<sub>4</sub> in acetonitrile with Ag/AgCl and Platinum wire as a working, reference and counter electrode.

FTIR spectrum in the region between 650 and 2500 cm<sup>-1</sup> was performed to investigate the surface functionality of the CuInS<sub>2</sub> NPs. The peak vibrations at 1184 cm<sup>-1</sup> predict the presence of the epoxy group. Further, the peaks vibrations found at 1108 cm<sup>-1</sup> are also noticeable at higher indicate S-O stretching.

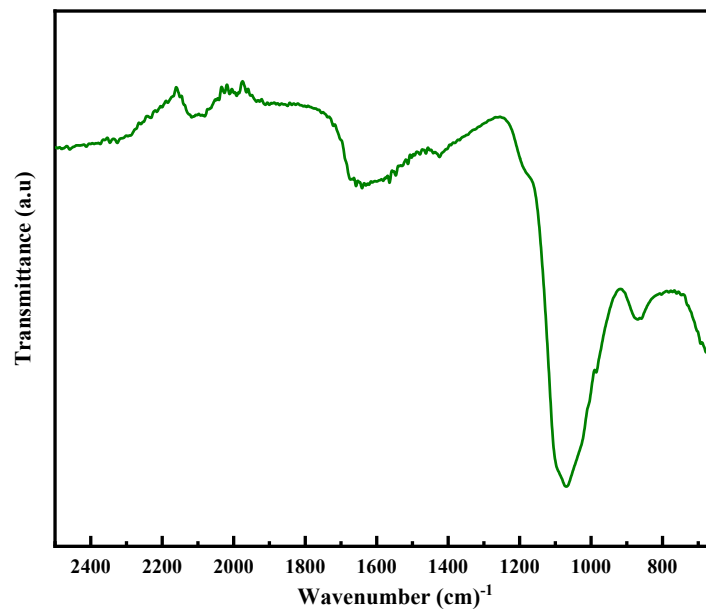

Supplement: d2cp04358k1.pdf [file d2cp04358k1.pdf]
